# Supplementary material
Source: PubMed Central journal article supplement (PMC9731140)
Supplement: NIHMS1852174-supplement-1.pdf [file NIHMS1852174-supplement-1.pdf]

**Supplemental Table 1: Patient and tumor characteristics**

| Subject ID | Age | Sex | Primary Site | Histology Type <sup>1</sup> | KRAS Status <sup>2</sup> | PCI <sup>3</sup> | ddPCR MAF (%) | Pre-collection treatment <sup>5</sup> | Surgery <sup>4</sup> | Post-collection treatment <sup>5</sup> | Follow up (Months) <sup>6</sup> | Status at last follow up |
|------------|-----|-----|--------------|-----------------------------|--------------------------|------------------|---------------|---------------------------------------|----------------------|----------------------------------------|---------------------------------|--------------------------|
| GI0578     | 62  | M   | Unknown      | AD                          | WT                       | 39               | 0             | None                                  | DLI                  | FOLFOX                                 | 3.3                             | Dead                     |
| GI0583     | 44  | F   | Unknown      | AD-SRC                      | UNK                      | 39               | 0             | None                                  | DL                   | None                                   | 1.1                             | Alive                    |
| GI0584     | 61  | M   | Appendix     | MAD                         | UNK                      | 39               | 0             | None                                  | DL                   | None                                   | 0.7                             | Dead                     |
| GI0585     | 56  | F   | Colon        | AD                          | WT                       | 13               | 0.075         | FOLFIRI                               | CRS-HIPEC            | FOLFOX+Bev                             | 18.2                            | Dead                     |
| GI0586     | 67  | M   | Unknown      | AD                          | UNK                      | 39               | 0             | None                                  | DL                   | FOLFOX                                 | 19.9                            | Dead                     |
| GI0587     | 48  | M   | Colon        | AD                          | WT                       | 14               | 0             | None                                  | CRS-HIPEC            | FOLFOX/FOLFIRI                         | 40.3                            | Alive                    |
| GI0588     | 56  | F   | Unknown      | AD-SRC                      | UNK                      | 39               | 0             | FOLFOX                                | DL                   | FOLFIRI+Bev                            | 17.4                            | Dead                     |
| GI0605     | 55  | M   | Colon        | AD-SRC                      | WT                       | 0                | 0             | FOLFOX+Bev                            | HIPEC                | None                                   | 35.1                            | Alive                    |
| GI0611     | 52  | M   | Colon        | MAD                         | G12V                     | 33               | 4.350         | None                                  | DL                   | FOLFOX/FOLFIRI+Bev                     | 17.2                            | Dead                     |
| GI0665     | 63  | M   | Appendix     | GCC                         | WT                       | 23               | 0             | None                                  | DL                   | None                                   | 7.6                             | Dead                     |
| GI0677     | 40  | F   | Colon        | MAD                         | WT                       | NA               | 0             | Partial CRS                           | None                 | FOLFOXIRI/FOLFOX                       | 9.2                             | Dead                     |
| GI0694     | 69  | F   | Gallbladder  | AD                          | UNK                      | NA               | 0             | None                                  | None                 | None                                   | 0.8                             | Dead                     |
| GI0701     | 61  | F   | Appendix     | AD-GCC                      | G12D                     | 23               | 0.512         | None                                  | CRS-HIPEC            | FOLFOX+Bev                             | 25.1                            | Alive                    |
| GI0734     | 29  | M   | Rectum       | AD-SRC                      | UNK                      | 26               | 0             | None                                  | DLI                  | FOLFOX/FOLFOXIRI+Pan                   | 12.1                            | Dead                     |
| GI0764     | 63  | M   | Appendix     | AD-GCC                      | WT                       | 29               | 2.957         | FOLFOX+Bev                            | CRS-HIPEC            | None                                   | 13.3                            | Dead                     |
| GI0767     | 37  | F   | Jejunum      | AD                          | G12D                     | 13               | 4.680         | CAPOX                                 | CRS-HIPEC            | CAPOX+Bev                              | 19.5                            | Alive                    |
| GI0789     | 40  | F   | Colon        | AD                          | WT                       | 3                | 0             | FOLFOX                                | CRS-HIPEC            | FOLFIRI+Bev                            | 17.8                            | Alive                    |
| GI0791     | 62  | F   | Colon        | AD                          | G12V                     | 2                | 0.101         | 5FU+Bev                               | CRS                  | FOLFOX+Bev                             | 17.0                            | Alive                    |
| GI0794     | 66  | M   | Appendix     | AD-GCC                      | UNK                      | 39               | 0             | None                                  | DL                   | FOLFIRI                                | 20.0                            | Alive                    |
| GI0812     | 51  | F   | Pancreas     | MAD                         | G12D                     | NA               | 4.593         | None                                  | None                 | Partial CRS                            | 4.9                             | Dead                     |
| GI0825     | 54  | M   | Appendix     | AD-SRC                      | G12V                     | NA               | 4.350         | FOLFOX/Cis/Reg                        | None                 | None                                   | 1.1                             | Dead                     |
| GI0827     | 68  | F   | Appendix     | AD                          | UNK                      | 27               | 0             | CAPOX                                 | DLI                  | FOLFOX                                 | 5.1                             | Dead                     |
| GI0828     | 69  | M   | Pancreas     | MAD                         | UNK                      | 8                | 0.327         | None                                  | DL                   | Gem+Pac+Ascorbate                      | 4.3                             | Alive                    |
| GI0830     | 64  | F   | Pancreas     | AD                          | UNK                      | NA               | 7.995         | FOLFIRINOX/Gem+Pac                    | None                 | None                                   | 0.6                             | Dead                     |
| GI0863     | 62  | M   | Unknown      | MAD                         | WT                       | NA               | 0             | None                                  | DL                   | FOLFOX/5FU+Bev                         | 13.5                            | Alive                    |
| GI0866     | 67  | F   | Unknown      | AD-SRC                      | WT                       | 29               | 0             | FOLFOX/FOLFOXIRI                      | DL                   | FOLFIRI+Pan                            | 7.0                             | Alive                    |
| GI0877     | 59  | M   | Unknown      | AD                          | G12V                     | NA               | 0.112         | FOLFOX                                | None                 | None                                   | 1.1                             | Dead                     |
| GI0896     | 57  | F   | Appendix     | AD-GCC                      | WT                       | 17               | 0             | FOLFOXIRI                             | DL                   | FOLFIRI+Bev                            | 5.5                             | Alive                    |
| GI0949     | 56  | F   | Colon        | AD                          | UNK                      | 11               | 0             | FOLFIRI                               | CRS-HIPEC            | None                                   | 1.2                             | Alive                    |
| GI0955     | 40  | F   | Ileum        | AD                          | WT                       | 24               | 0.163         | FOLFOX+Bev                            | CRS-HIPEC            | Cap/5FU                                | 4.6                             | Alive                    |
| GI0970     | 23  | M   | Rectum       | AD                          | WT                       | 7                | 0             | FOLFOXIRI+Pan                         | CRS                  | FOLFOXIRI+Pan                          | 3.9                             | Alive                    |
| GI1005     | 44  | F   | Colon        | AD                          | WT                       | 7                | 0             | Pem                                   | Bowel bypass         | Pem/Nivo+ipi/Lar                       | 5.2                             | Alive                    |
| GI1034     | 56  | F   | Unknown      | AD                          | WT                       | NA               | 0             | None                                  | DL                   | FOLFOX+Bev                             | 5.4                             | Alive                    |
| GI1050     | 60  | F   | Pancreas     | MAD                         | G12D                     | 21               | 2.735         | None                                  | DL                   | Gem+Pac/FOLFIRINOX                     | 5.4                             | Dead                     |
| GI1095     | 54  | M   | Rectum       | AD-SRC                      | WT                       | NA               | 0             | FOLFOX+Pan                            | DL                   | FOLFIRI+Pan                            | 2.5                             | Alive                    |
| GI1107     | 47  | F   | Colon        | AD                          | G12V                     | 7                | 0.725         | FOLFOX                                | CRS                  | None                                   | 3.4                             | Alive                    |
| GI1130     | 46  | F   | Appendix     | MAD                         | G12D                     | 39               | 26.246        | FOLFOX/FOLFIRI/HIPEC                  | DLI                  | None                                   | 1.3                             | Dead                     |

1. AD: Adenocarcinoma, AD-SRC: Adenocarcinoma with signet ring cells, AD-GCC: Goblet cell adenocarcinoma, GCC: Goblet cell carcinoid, MAD: Mucinous adenocarcinoma

2. KRAS Status: Wild-type (WT), mutant (G12V, G12D), unknown (UNK)

3. Peritoneal Carcinomatosis Index (PCI) during surgical exploration. NA: Not available (for patients without surgery)

4. Surgery at the time of fluid collection: Diagnostic laparoscopy/laparotomy (DL), diverting loop ileostomy (DLI)

5. Treatment within 6 months of collection. 5FU: 5-Fluorouracil; Bev: Bevacizumab; Cap: Capecitabine; CAPOX: Capecitabine, oxaliplatin; Cis: Cisplatin; CRS: Cytoreductive surgery; FOLFIRI: 5FU, leucovorin, irinotecan; FOLFOX: 5FU, leucovorin, oxaliplatin; FOLFIRINOX: 5FU, leucovorin, irinotecan, oxaliplatin; Gem: Gemcitabine; Ipi: Ipilimumab; Lar: Larotrectinib; Nivo: Nivolumab; Pac: Nab-Paclitaxel; Pan: Panitumumab. Pem: Pembrolizumab; Reg: Regorafenib.

6. Follow up: Time interval between fluid collection and last follow-up or death.
